# Supplementary material for: Perinatal Exposure to Triclosan Results in Abnormal Brain Development and Behavior in Mice
Source: PubMed Central journal article supplement (PMC7312693; doi:10.3390/ijms21114009), 2020-06-03
Supplement: ijms-21-04009-s001.pdf [file ijms-21-04009-s001.pdf]

# Supplementary figure-1

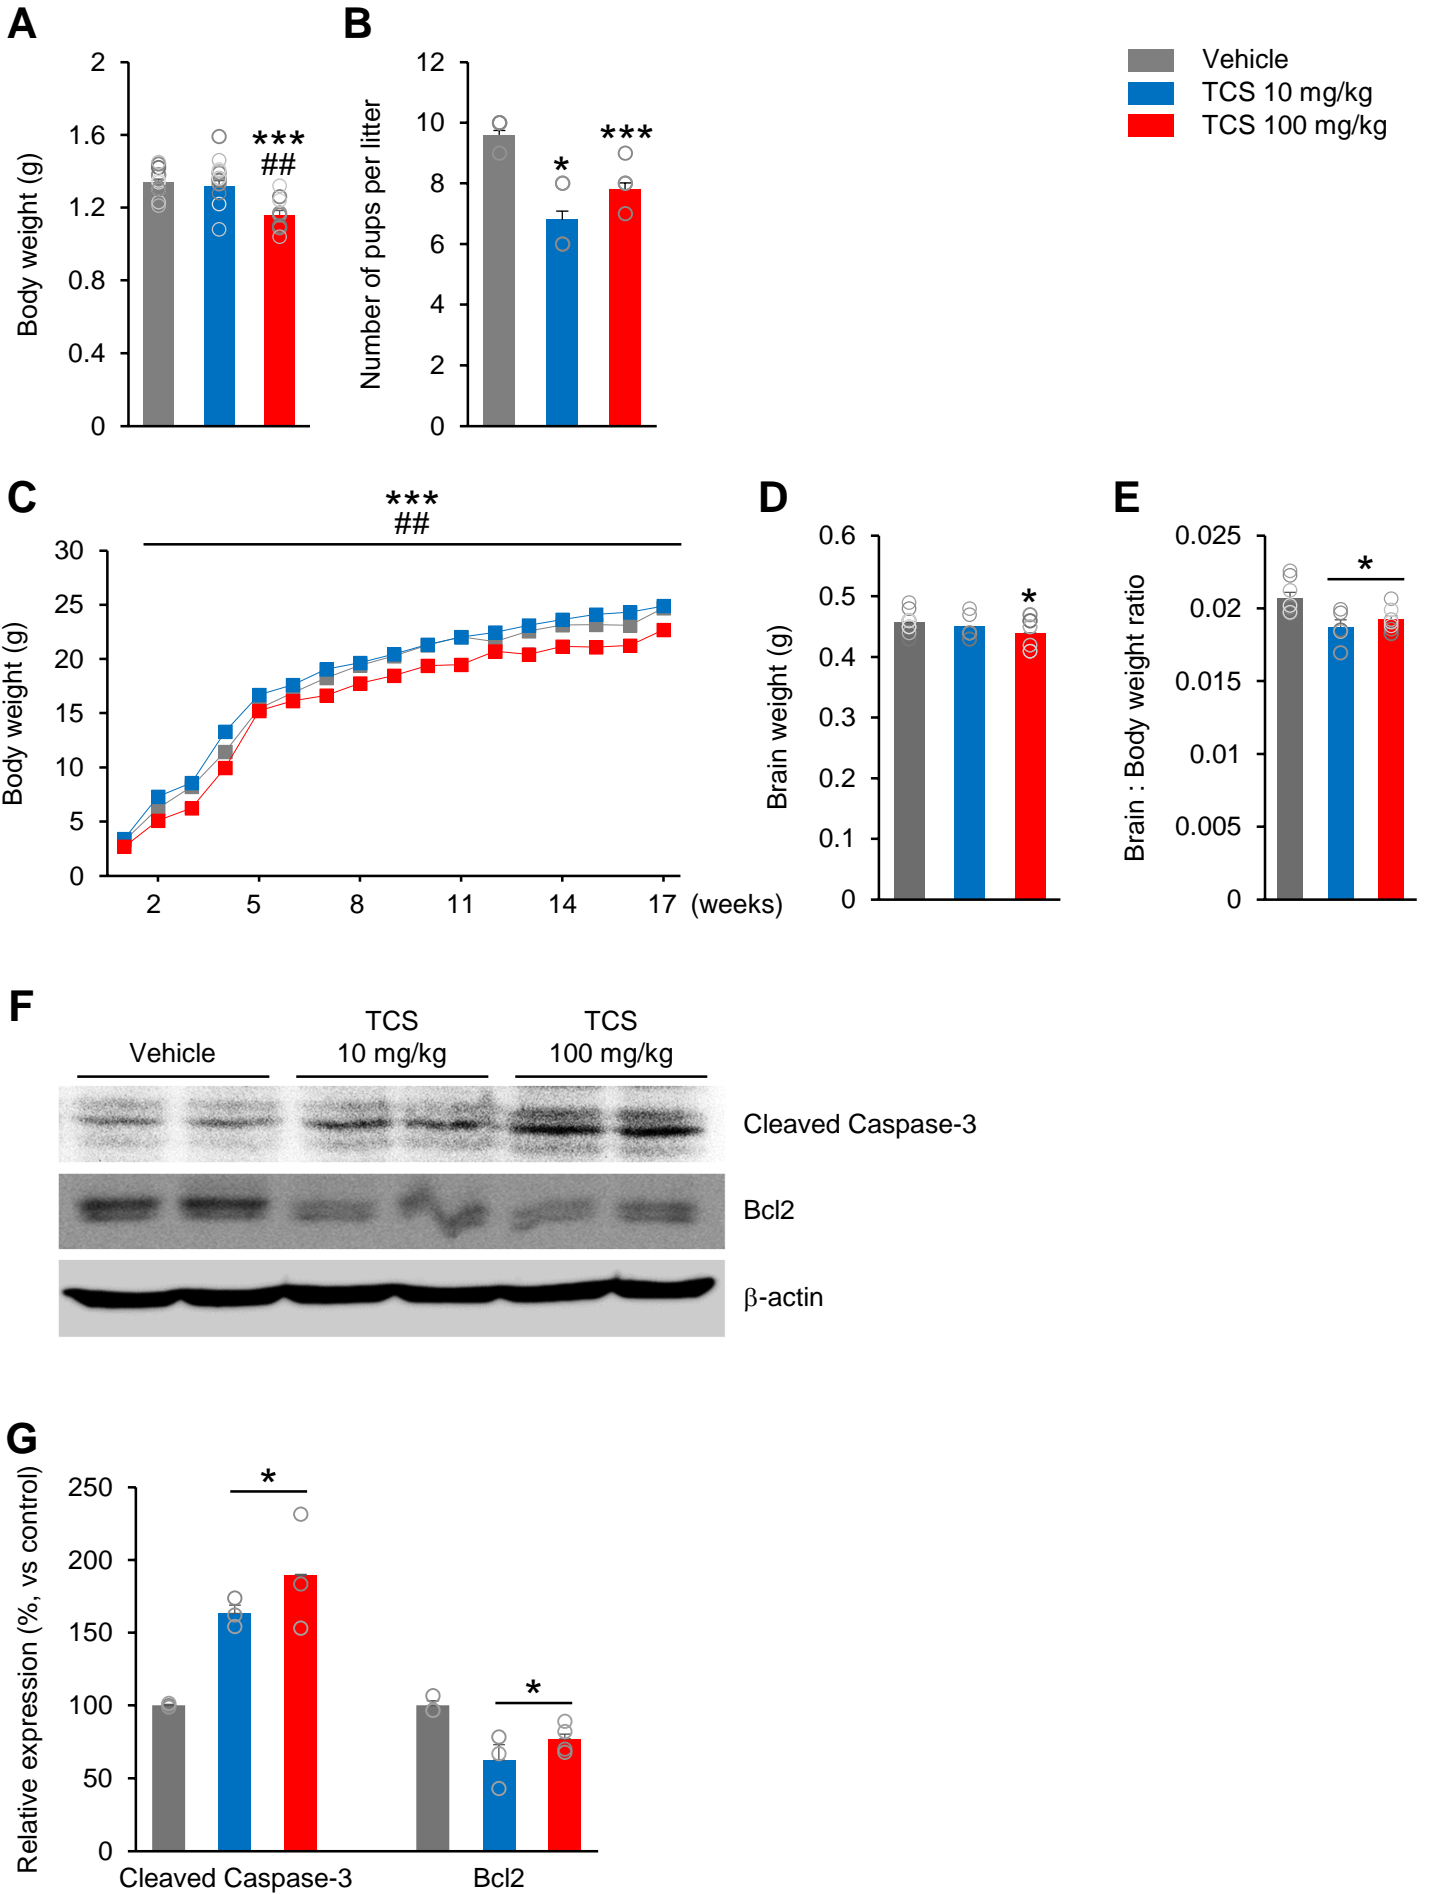

**Supplementary figure 1.** Impair of TCS on the growth of offspring mice. **(A)** The body weight of offspring mice at PND1. At dose 100 mg/kg, TCS-exposure showed significantly decreased the birth weight compare to vehicle group. There was no change in TCS 10 mg/kg group and vehicle group. **(B)** The numbers of per litter were significantly decreased in the TCS-treated groups compared to the vehicle group. **(C)** The body weight of offspring mice was weekly assessed. TCS 100 mg/kg group delayed the offspring growth and development compared to vehicle group. **(D)** Brain weight of offspring mice at PND 119. There was significantly decreased in the brain weight in TCS 100 mg/kg group compare to vehicle. **(E)** Ratio of brain weight to the whole bodyweight at PND 119. TCS-groups showed significant decreased in the ratio of brain weight to whole body weight compared to vehicle group. Total brain caspase-3 and Bcl2 protein content of adult offspring mice were analyzed through Western blotting, using  $\beta$ -actin as loading control. **(F)** Representation of western blots. **(G)** Quantification of **F**. There were markedly higher in the protein level of cleaved caspase-3 in TCS 100 mg/kg group compared to the TCS 10 and vehicle groups. The expressions of Bcl2 protein were significantly lower in both TCS-treated groups. n= 10 mice (4 male, 6 female) for vehicle, 6 mice (4 male, 2 female) for TCS 10 mg/kg, 9 mice (5 male, 4 female) for TCS 100 mg/kg). Data represent mean  $\pm$  SEM. Data represent mean  $\pm$  SEM. Statistical significance was determined by one-way ANOVA with Bonferroni correction. \* $p < 0.05$  vs. vehicle, \* $p < 0.01$  vs. vehicle, \*\*\* $p < 0.001$  vs. vehicle, ## $p < 0.01$  TCS 10 mg/kg vs. TCS 100 mg/kg. Treatments: corn oil; vehicle, TCS; 10 mg/kg/day, TCS; 100 mg/kg.

# Supplementary figure-2

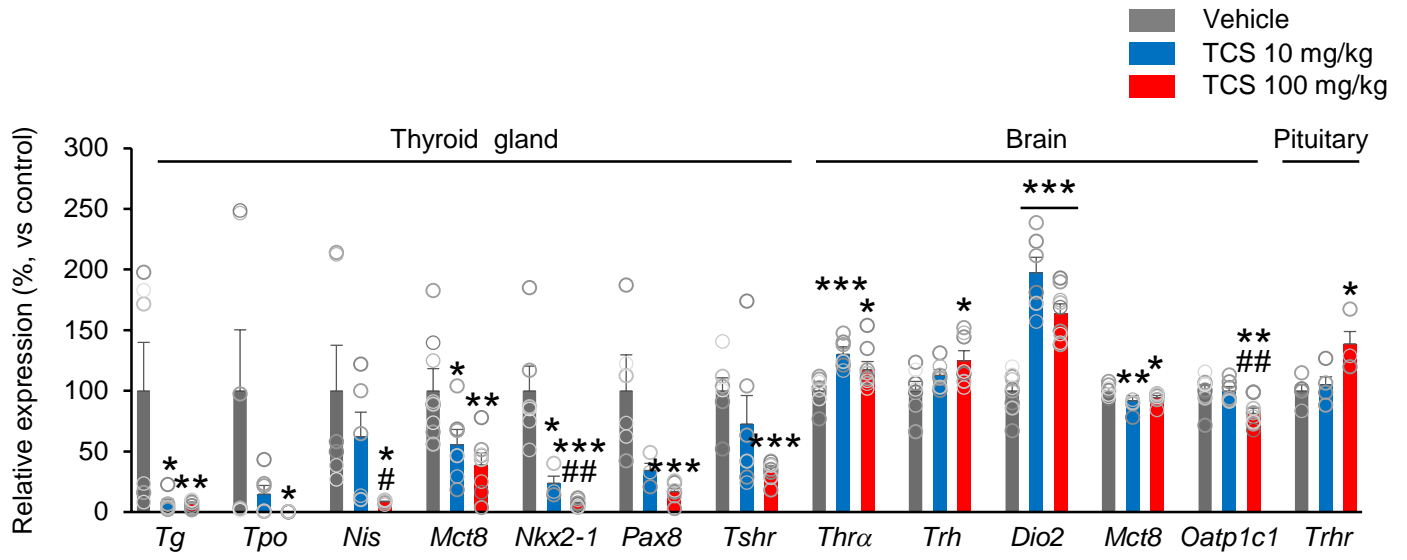

**Supplementary figure 2.** Impair of TCS on thyroid development and function in mice. Gene expression assessed by realtime quantitative PCR and normalized to *GAPDH* mRNA content in thyroids, brains and pituitary of offspring mice. Thyroid expression of *Tg*, *Tpo*, *Nis*, *Mct8*, *Nkx2-1*, *Pax8* and *Tshr* mRNA levels were reduced in TCS-treated groups compared to vehicle group. Brain *Thra*, *Trh*, and *Dio2* mRNA levels were higher in TCS-treated groups compared to vehicle group. Whereas, brain *Mct8* and *Oapt1c1* mRNA levels were lower in TCS-treated group compared to vehicle group (n= 10 mice (4 male, 6 female) for vehicle, 6 mice (4 male, 2 female) for TCS 10 mg/kg, 9 mice (5 male, 4 female) for TCS 100 mg/kg). Pituitary *Trhr* mRNA content was increased in TCS 100 mg/kg group compared to vehicle group. n= 5 mice (3 male, 2 female) for vehicle, 4 mice (2 male, 2 female) for TCS 10 mg/kg, 5 mice (3 male, 3 female) for TCS 100 mg/kg. Data represent mean  $\pm$  SEM. Data represent mean  $\pm$  SEM. Statistical significance was determined by one-way ANOVA with Bonferroni correction. \* $p$  < 0.05 vs. vehicle, \* $p$  < 0.01 vs. vehicle, \*\*\* $p$  < 0.001 vs. vehicle. # $p$  < 0.05 TCS 10 mg/kg vs. TCS 100 mg/kg, ## $p$  < 0.01 TCS 10 mg/kg vs. TCS 100 mg/kg. Treatments: corn oil; vehicle, TCS; 10 mg/kg/day, TCS; 100 mg/kg.

# Supplementary figure-3

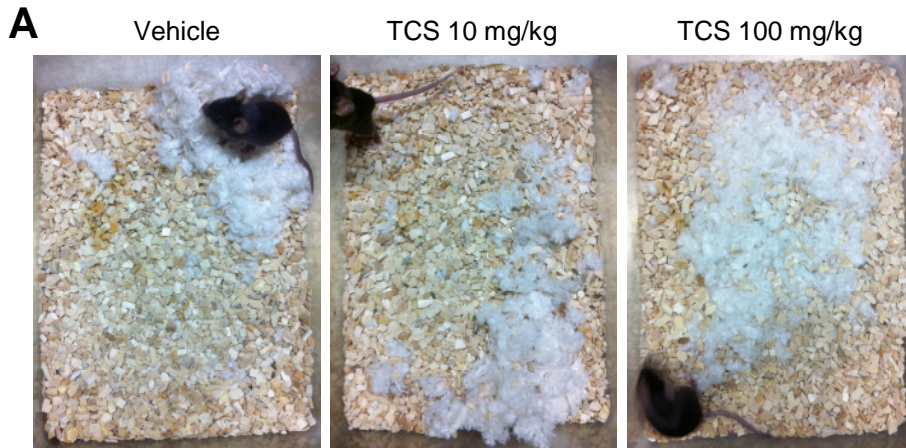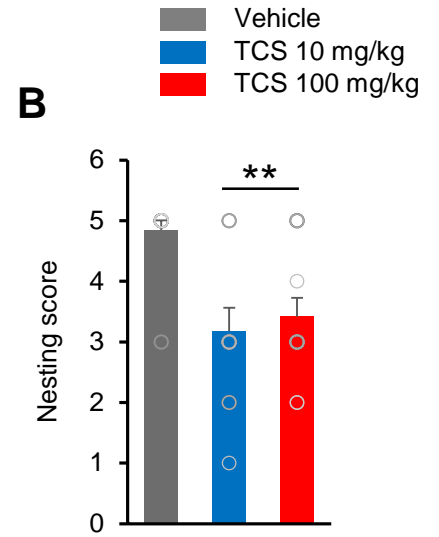

**Supplementary figure 3.** Impair of TCS on nesting-building behavior in offspring mice. **(A)** Representative images showed the built nest after 12 h after introduction of nesting material. **(B)** Nesting score (mean  $\pm$  s.e.m.) represents the amount of nesting material used and shape of the nest during the 12-h test period. Score 1 represents an almost untouched nestlet, for score 3 >50% was shredded but not into a specific nest shape, and score 5 represents an almost perfect nest where >90% of the nestlet was used to build the nest as a crater and the walls were higher than the mouse body height. Data represent mean  $\pm$  SEM. Data represent mean  $\pm$  SEM. Statistical significance was determined by one-way ANOVA with Bonferroni correction. n= 14 mice (8 male, 6 female) for vehicle, 11 mice (8 male, 3 female) for TCS 10 mg/kg, 13 mice (8 male, 5 female) for TCS 100 mg/kg. \*\* $p < 0.01$  vs. vehicle. Treatments: corn oil; vehicle, TCS; 10 mg/kg/day, TCS; 100 mg/kg.

# Supplementary figure-4

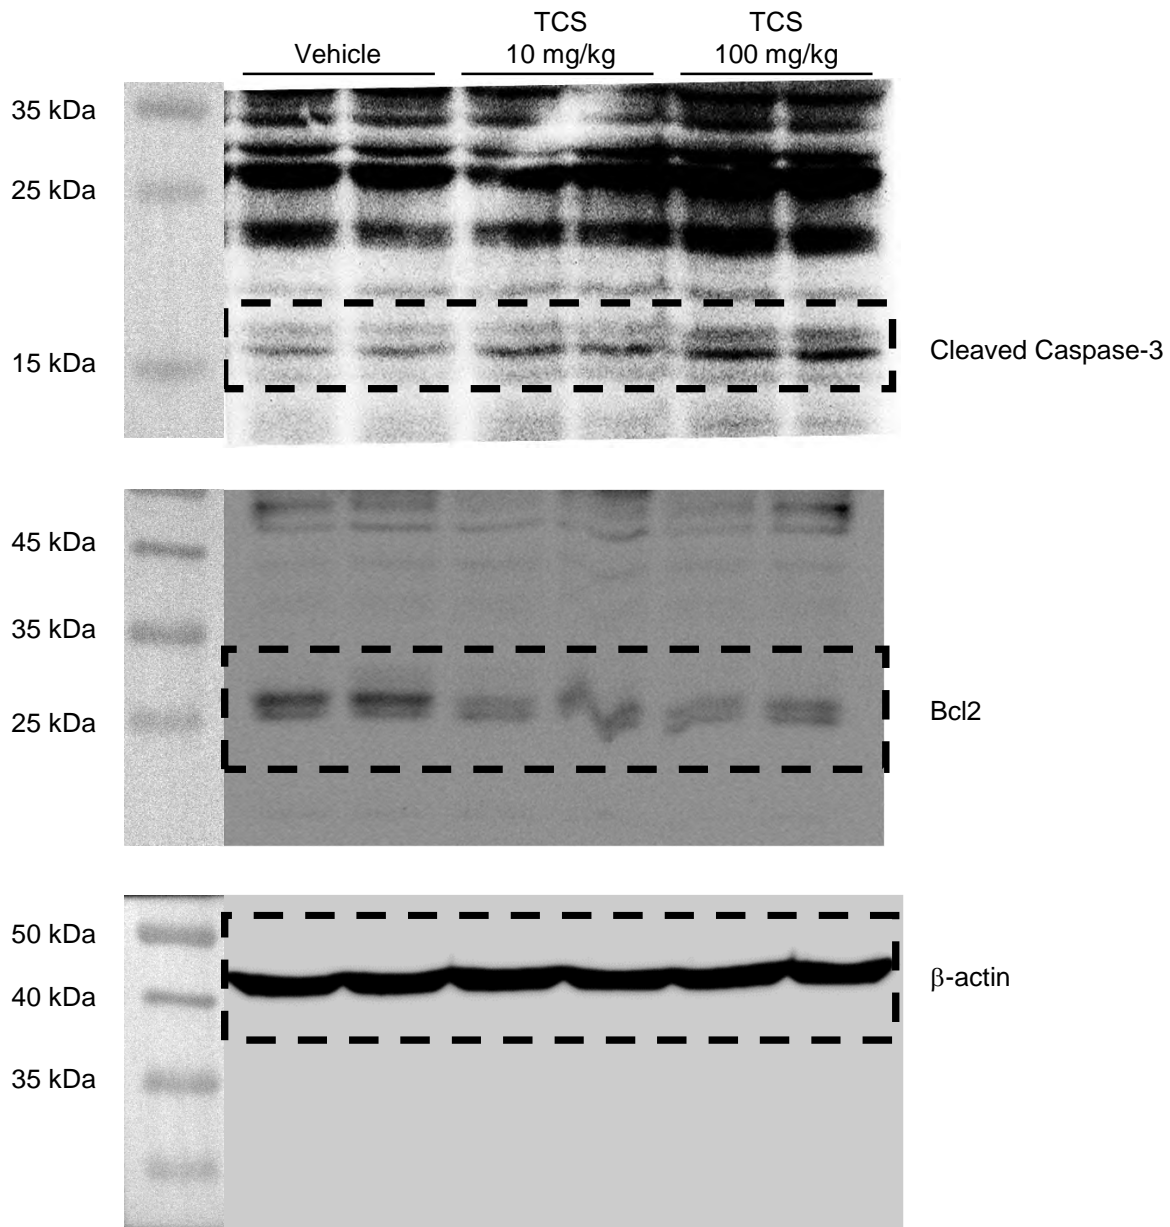

**Supplementary figure 4.** Western blot images. Western blot images for supplementary figure 1E.



44 **Supplementary Table 1.** Primers used for gene expression analysis through Real-Time PCR.

|                | Forward                | Reverse                | 45 |
|----------------|------------------------|------------------------|----|
| <i>Tg</i>      | ACAGCATTGAAAGGGCGGTA   | ATACAAGGTGGTGTCCGCTG   | 45 |
| <i>Tpo</i>     | GCAGGTGGACACATGCTGATA  | CTGGATCCACTGCAGGTTC    |    |
| <i>Nis</i>     | CCAGTACCTAGAACTGCGCTT  | ATGTCCAACCCGGTCACTTG   |    |
| <i>Mct8</i>    | CTTCGGCTGGATAGTGGTGT   | GACCCATGCTGCTTGGAAC    |    |
| <i>Nkx2-1</i>  | AACAGAAGTACCTGTCGGCG   | CTTAGCCTGGCGCTTCATCT   |    |
| <i>Pax8</i>    | ACTCGATCAGATCCGGCCAT   | AATATCACAGGGCCTCACGC   |    |
| <i>Tshr</i>    | CAAAGCTGGATGCTGTTTACCT | GATTTGTGCCTGGTGGAAATCA |    |
| <i>Thra</i>    | AAGCTGCTGATGAAGGAGAGAG | CCTGAACAACATGCATTCCGA  |    |
| <i>Trh</i>     | TTGGTGCTGCCTTAGATTCCT  | GGCTCCCACTTCTCCCAAAT   |    |
| <i>Dio2</i>    | AACCAAGAGGACCGATGTGC   | CGTTCAAAGGCTACCCCGTA   |    |
| <i>Oatp1c1</i> | TGTAGGGGATTCCAGCTCCT   | GTCTGCACACACCCGATGTA   |    |
| <i>Trhr</i>    | CTATGGACATGCTGGCTGCT   | CGATGTACCTCTCCACAGTGA  |    |
| <i>GAPDH</i>   | AAGGTCATCCCAGAGCTGAA   | AGGAGACAACCTGGTCCTCA   |    |

47 **Supplementary Table 2.** Summary of behavior statistic data

| Test              | Duration | Measurement          | Number of animals                    | Values                                                                                                     | Statistical test                              |
|-------------------|----------|----------------------|--------------------------------------|------------------------------------------------------------------------------------------------------------|-----------------------------------------------|
| Morris water maze | 1 min    | Escape latency (sec) | VE = 18<br>TCS10 = 11<br>TCS100 = 17 | Day1<br>$VE = 36.79 \pm 2.63$<br>$TCS10 = 47.39 \pm 2.76$<br>$TCS100 = 49.51 \pm 2.27$                     | One-way ANOVA with Bonferroni correction test |
|                   |          |                      |                                      | Day2<br>$VE = 13.07 \pm 1.08$<br>$TCS10 = 31.70 \pm 2.74$<br>$TCS100 = 17.93 \pm 1.88$                     |                                               |
|                   |          |                      |                                      | Day3<br>$VE = 8.64 \pm 0.73$<br>$TCS10 = 16.66 \pm 2.31$<br>$TCS100 = 15.32 \pm 1.90$                      |                                               |
|                   |          |                      |                                      | Day4<br>$VE = 6.47 \pm 0.55$<br>$TCS10 = 11.64 \pm 1.67$<br>$TCS100 = 9.72 \pm 1.09$                       |                                               |
|                   |          |                      |                                      | Day5<br>$VE = 7.10 \pm 0.34$<br>$TCS10 = 11.59 \pm 1.54$<br>$TCS100 = 9.54 \pm 0.82$                       |                                               |
|                   |          |                      |                                      | Day6<br>$VE = 6.14 \pm 0.45$<br>$TCS10 = 8.55 \pm 0.87$<br>$TCS100 = 8.47 \pm 0.86$                        |                                               |
|                   |          |                      |                                      | Day7<br>$VE = 5.22 \pm 0.44$<br>$TCS10 = 8.59 \pm 0.72$<br>$TCS100 = 6.66 \pm 0.40$                        |                                               |
|                   |          |                      |                                      | Day8<br>$VE = 6.47 \pm 0.49$<br>$TCS10 = 8.66 \pm 0.83$<br>$TCS100 = 9.71 \pm 1.39$                        |                                               |
|                   |          |                      |                                      | Day9<br>$VE = 3.57 \pm 0.30$<br>$TCS10 = 8.07 \pm 0.98$<br>$TCS100 = 5.87 \pm 0.64$                        |                                               |
|                   |          |                      |                                      | Platform crossing<br>$VE = 6.06 \pm 0.45$<br>$TCS10 = 4.45 \pm 0.45$<br>$TCS100 = 4.70 \pm 0.32$           |                                               |
|                   |          |                      |                                      | Distance move (cm)<br>$VE = 730.64 \pm 25.90$<br>$TCS10 = 681.77 \pm 22.86$<br>$TCS100 = 713.50 \pm 19.54$ |                                               |
|                   |          |                      |                                      | Velocity (cm/s)<br>$VE = 12.17 \pm 0.42$<br>$TCS10 = 11.32 \pm 0.37$<br>$TCS100 = 11.94 \pm 0.31$          |                                               |
|                   |          |                      |                                      | Novel object recognition                                                                                   |                                               |

|                  |         |                               |                                      |                                                                        |                                                                                                                                                                                                                                |                                    |
|------------------|---------|-------------------------------|--------------------------------------|------------------------------------------------------------------------|--------------------------------------------------------------------------------------------------------------------------------------------------------------------------------------------------------------------------------|------------------------------------|
| Social behavior  | 10 min  | Time spent in chamber (sec)   | VE = 18<br>TCS10 = 11<br>TCS100 = 17 | Sociability                                                            | VE; Empty = 153.83 ± 5.59<br>VE; Stranger I = 274.15 ± 8.67<br>TCS10; Empty = 186.19 ± 11.16<br>TCS10; Stranger I = 237.18 ± 16.23<br>TCS100; Empty = 151.51 ± 7.40<br>TCS100; Stranger I = 251.19 ± 13.90                     | Two-tailed Student's <i>t</i> test |
|                  |         |                               |                                      | Social novelty                                                         | VE; Stranger I = 149.92 ± 14.48<br>VE; Stranger II = 220.07 ± 15.36<br>TCS10; Stranger I = 207.47 ± 11.56<br>TCS10; Stranger II = 192.23 ± 19.74<br>TCS100; Stranger I = 183.92 ± 6.94<br>TCS100; Stranger II = 212.21 ± 13.12 |                                    |
| Open field       | 5 min   | Time in center (sec)          | VE = 18<br>TCS10 = 11<br>TCS100 = 17 | VE = 14.27 ± 2.17<br>TCS10 = 13.89 ± 2.95<br>TCS100 = 7.22 ± 1.17      | One-way ANOVA with Bonferroni correction test                                                                                                                                                                                  |                                    |
|                  |         | Number of entries into center |                                      | VE = 11.00 ± 0.82<br>TCS10 = 12.90 ± 1.63<br>TCS100 = 5.88 ± 0.64      |                                                                                                                                                                                                                                |                                    |
| Forced swim      | 5 min   | Immobility time (sec)         | VE = 18<br>TCS10 = 11<br>TCS100 = 17 | VE = 188.66 ± 11.08<br>TCS10 = 189.05 ± 6.95<br>TCS100 = 191.19 ± 7.92 | One-way ANOVA with Bonferroni correction test                                                                                                                                                                                  |                                    |
| Tail suspension  | 5 min   | Immobility time (sec)         | VE = 18<br>TCS10 = 11<br>TCS100 = 17 | VE = 77.56 ± 11.22<br>TCS10 = 60.21 ± 8.59<br>TCS100 = 78.78 ± 9.49    | One-way ANOVA with Bonferroni correction test                                                                                                                                                                                  |                                    |
| Nesting behavior | 12 hour | Nesting score                 | VE = 14<br>TCS10 = 11<br>TCS100 = 13 | VE = 4.64 ± 0.27<br>TCS10 = 3.18 ± 0.38<br>TCS100 = 3.54 ± 0.33        | One-way ANOVA with Bonferroni correction test                                                                                                                                                                                  |                                    |

VE: Vehicle; TCS10: TCS 10 mg/kg/day; TCS100: TCS 100 mg/kg/day
